# Supplementary material for: Simplified high-throughput methods for deep proteome analysis on the timsTOF Pro
Source: bioRxiv or medRxiv preprint supplement (doi:10.1101/657908), 2021-04-07

# Supplementary Figure 1

A.

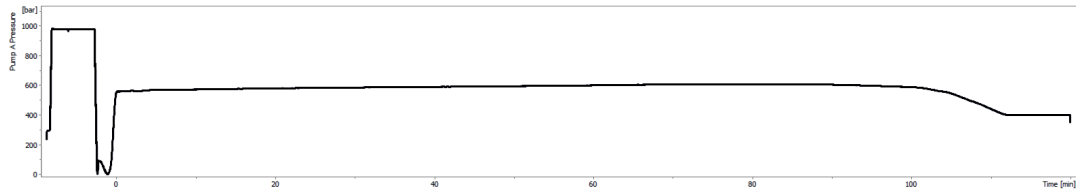

B.

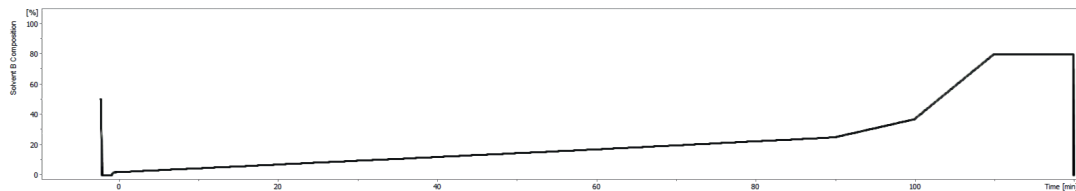

C.

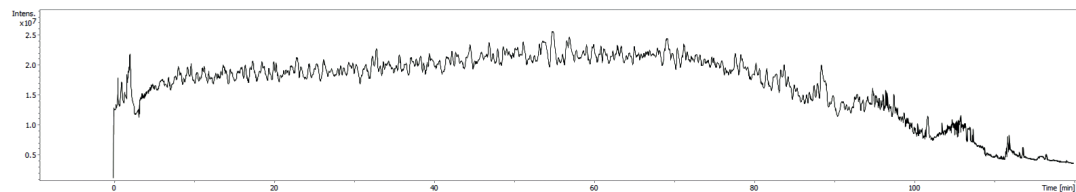

D.

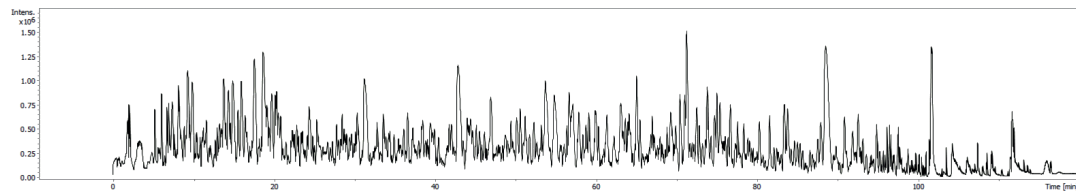

# Supplementary Figure 2

A.

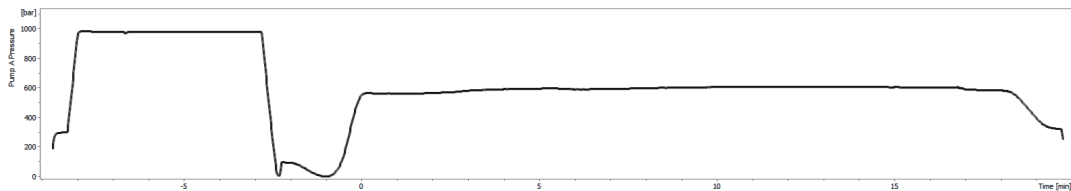

B.

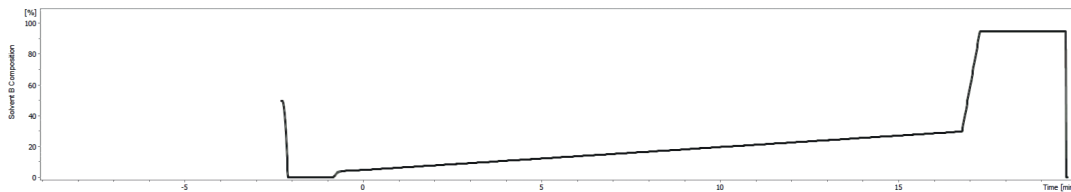

C.

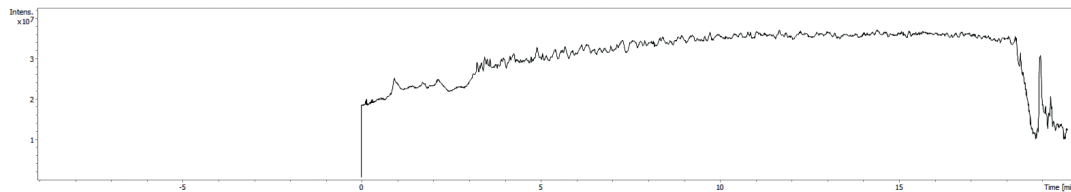

D.

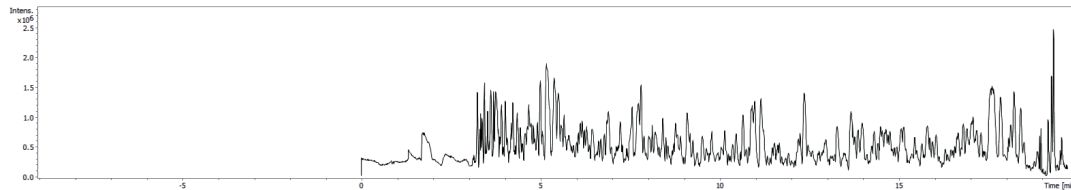

# Supplementary Figure 3

A.

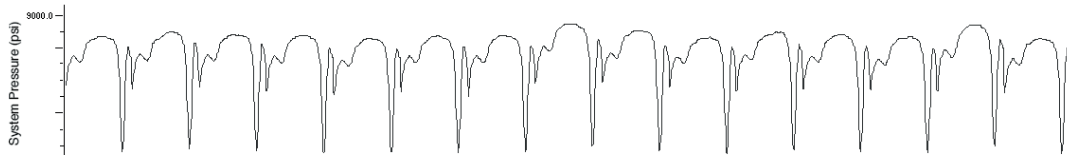

B.

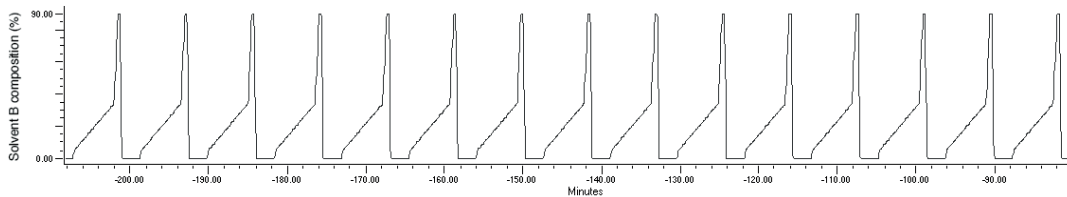

C.

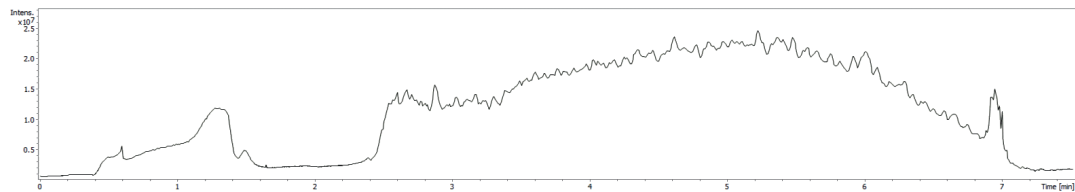

D.

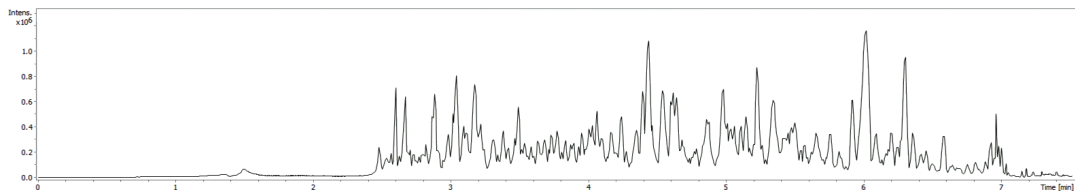

# Supplementary Figure 4

A

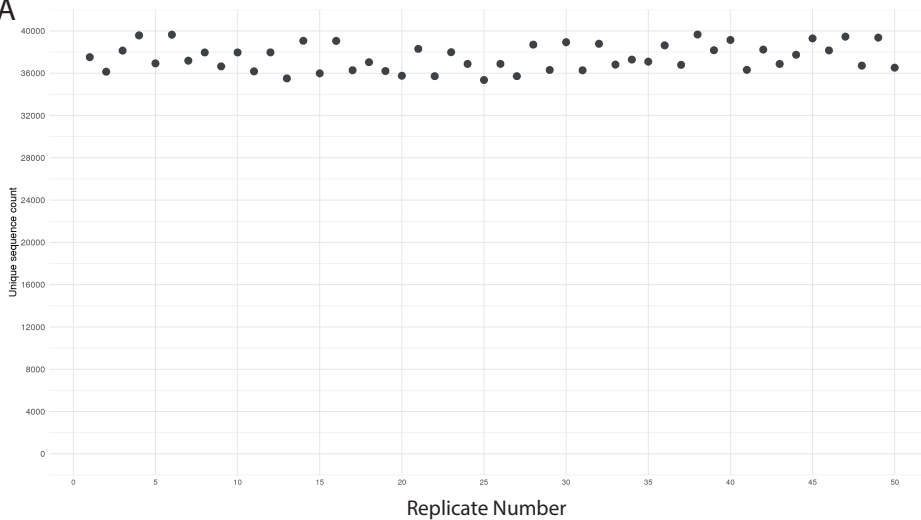

B

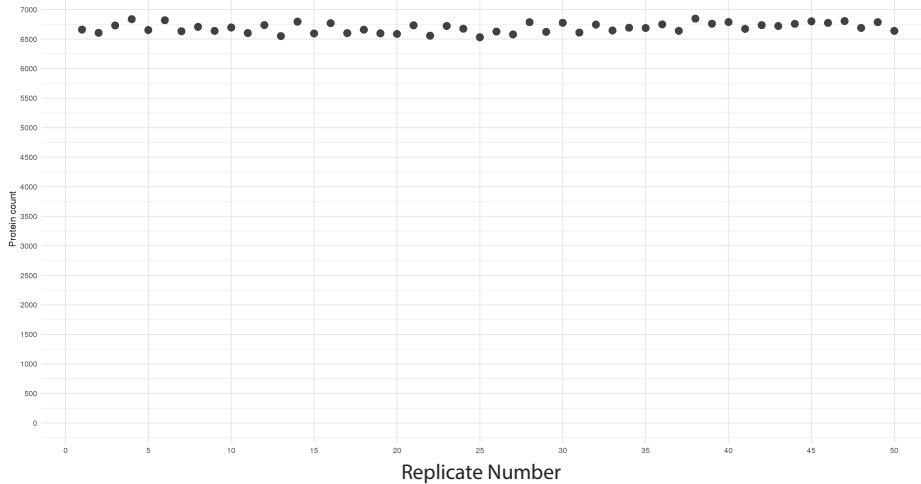

Supplementary Figure 5

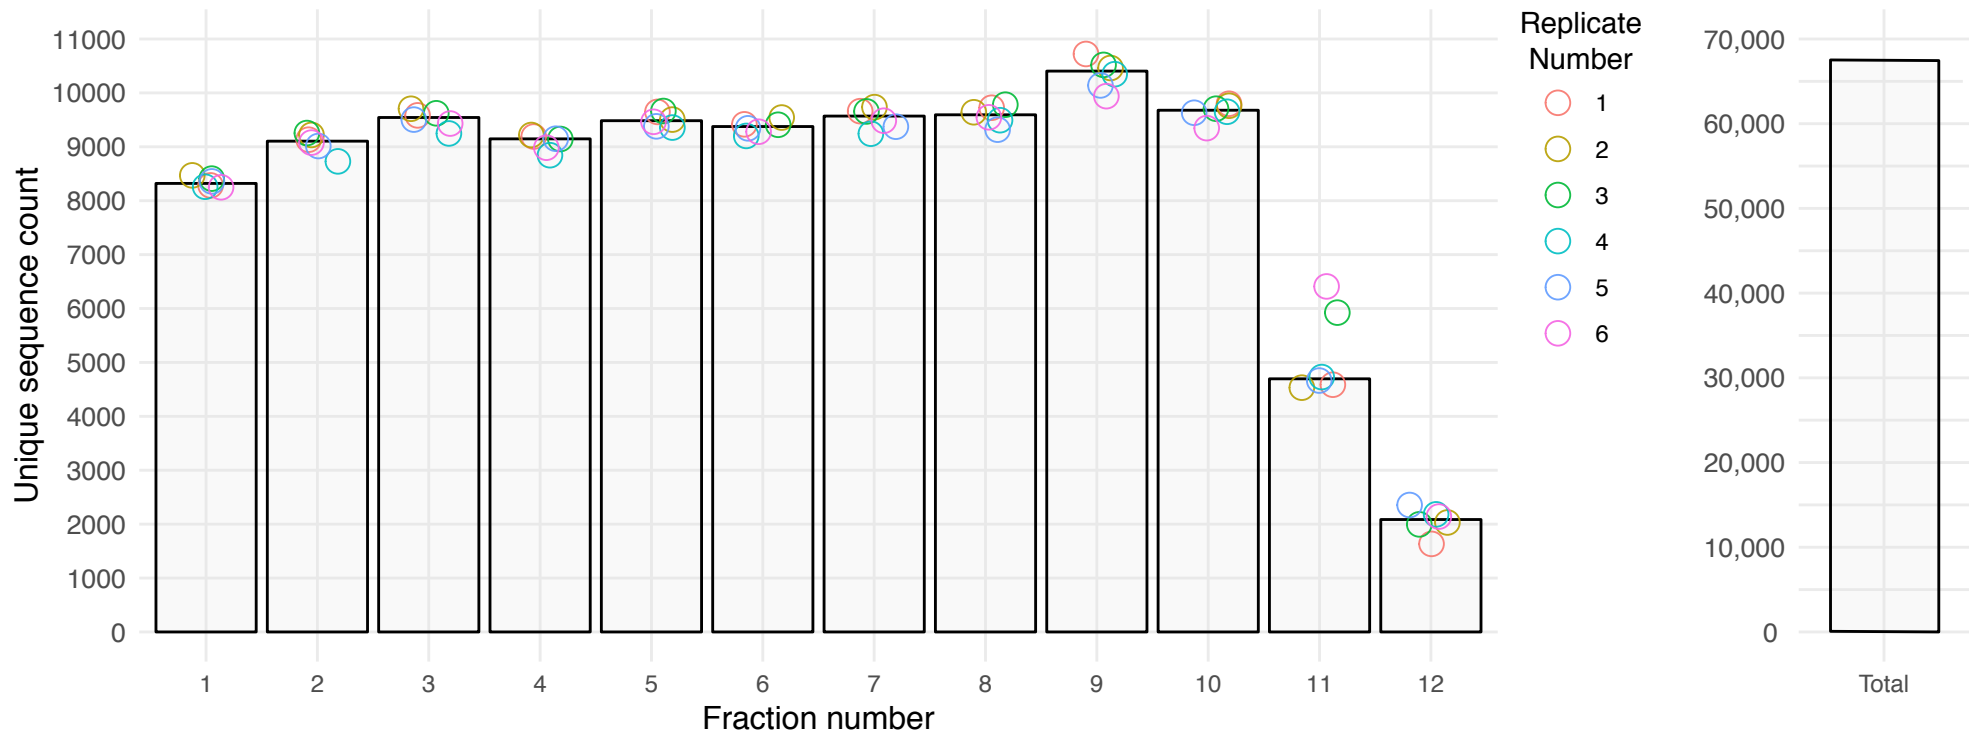

Supplementary Figure 6

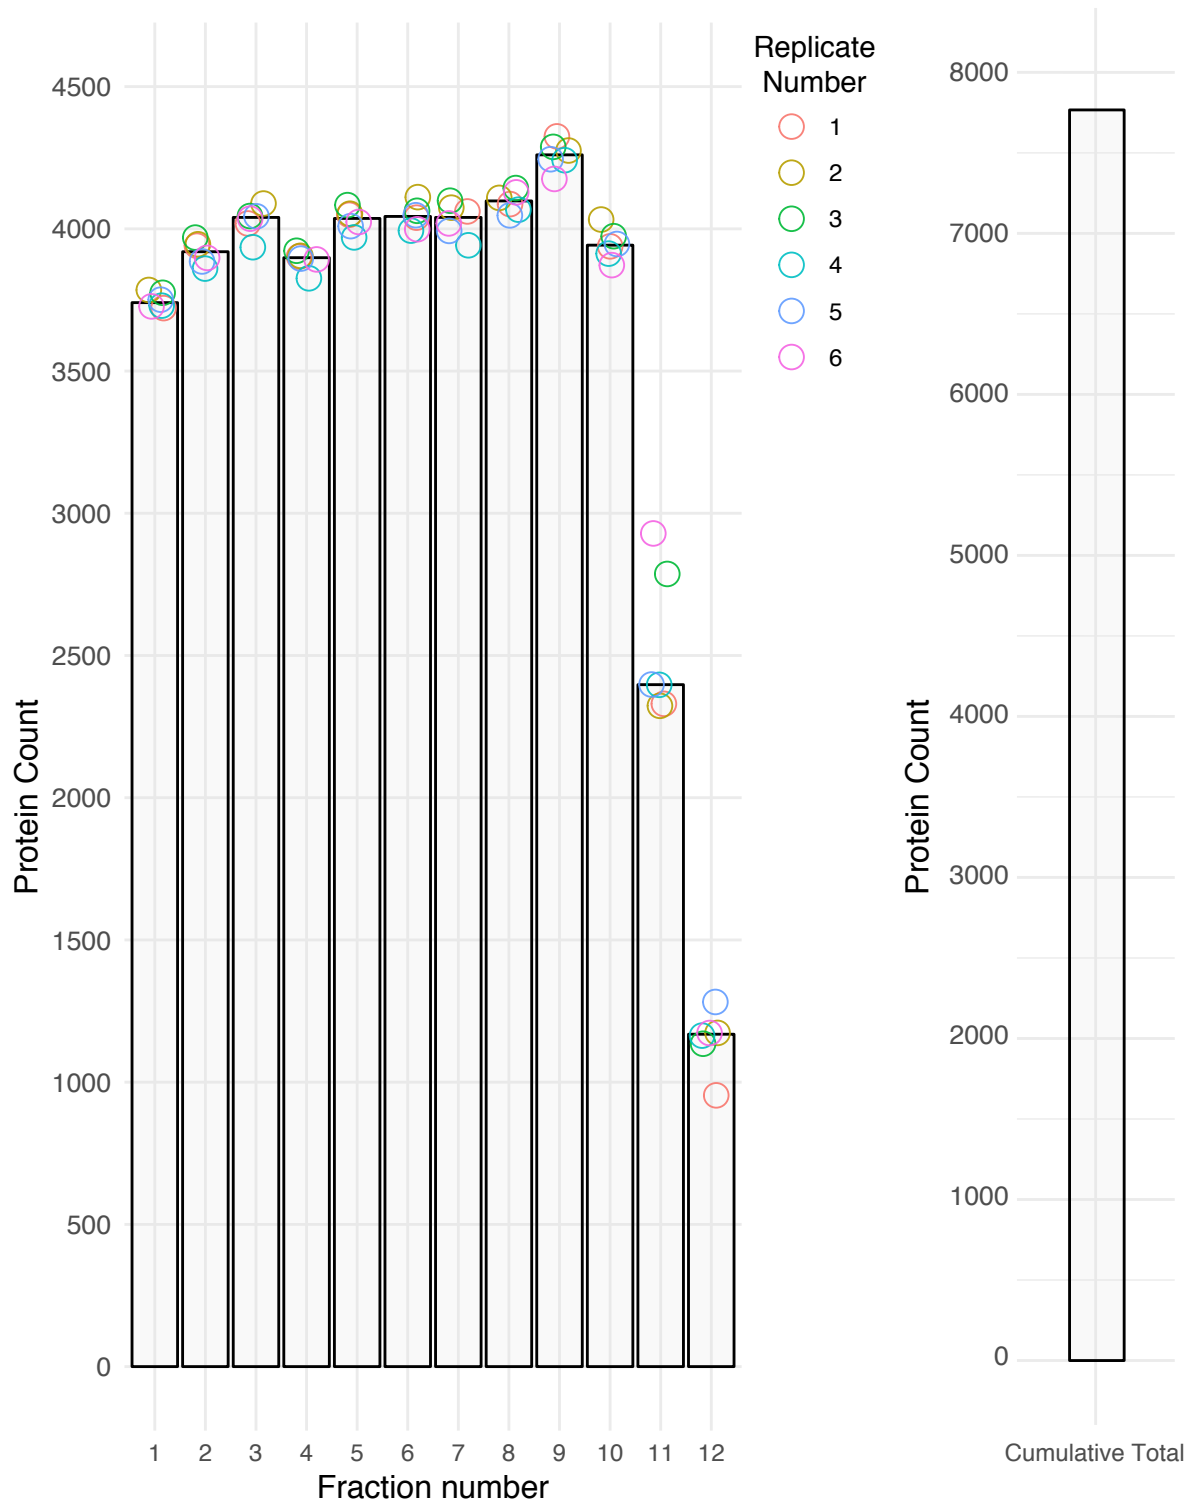

# Supplementary Figure 7

## A

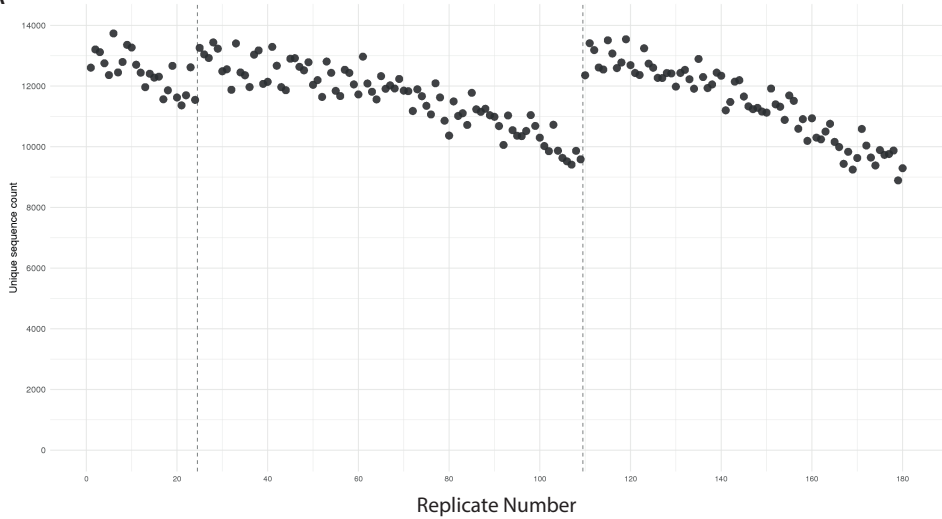

## B

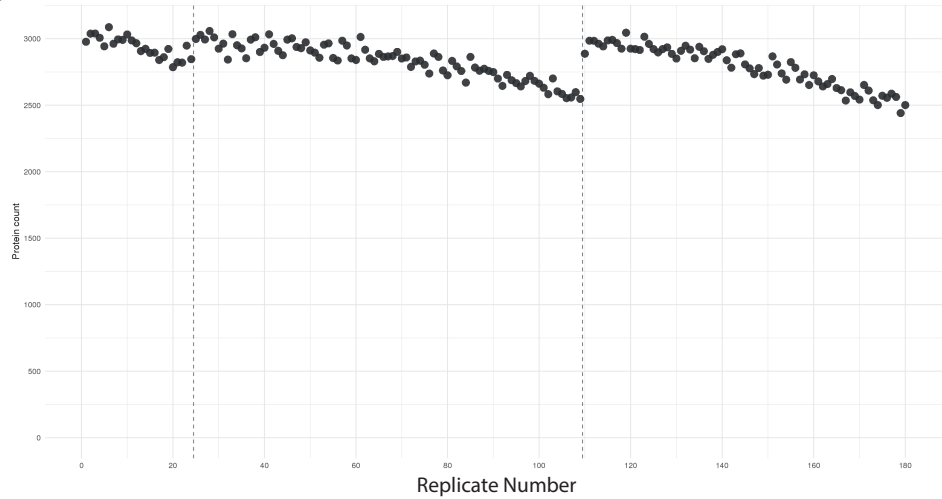

Supplementary Figure 8

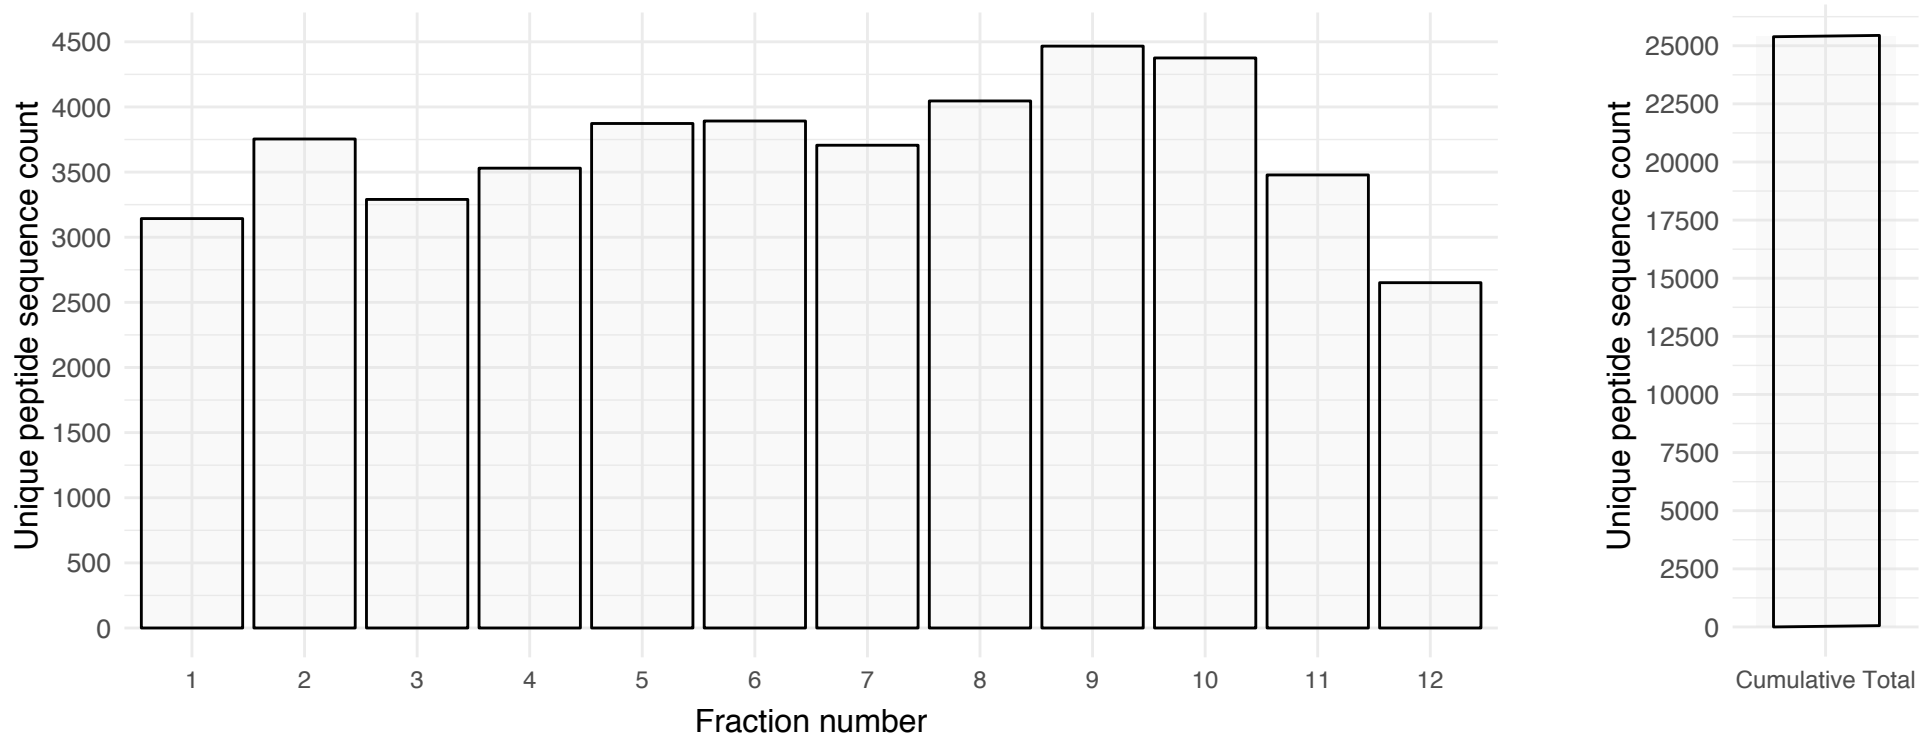



Supplementary Figure 9

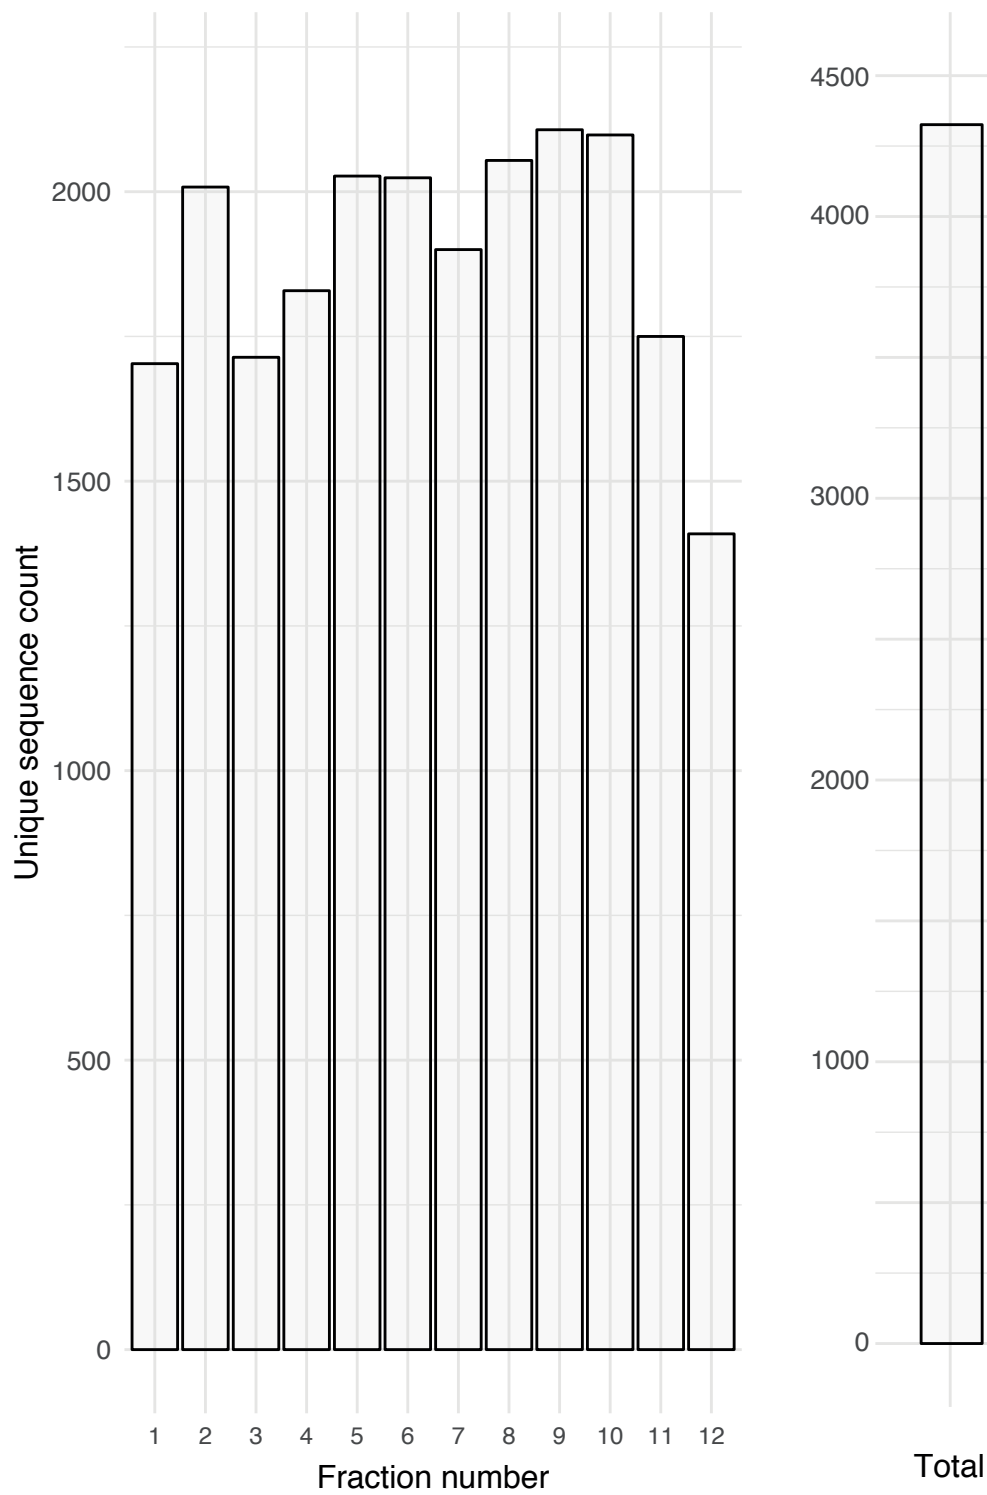

Supplementary Figure 10

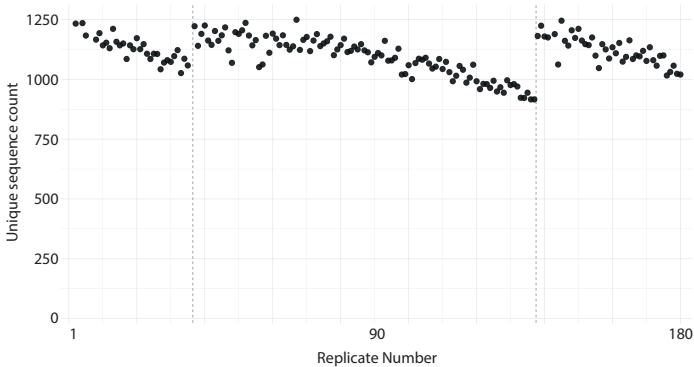

Supplement: Supplementary file [file media-1.pdf]
